# Supplementary material
Source: publisher figshare collection journal article supplement (https://asha.figshare.com/articles/dataset/_/22555534)
Supplement: Supplementary file 1 [file 1]

**Supplemental Material S1.** Diagnostic features of the nonfluent variant (nfvPPA), the semantic variant (svPPA) and the logopenic variant (lvPPA) of primary progressive aphasia following the consensus criteria formulated by Gorno-Tempini et al. (2011).

| PPA variant | Single-word comprehension | Comprehension of syntactically complex sentences | Confrontation naming | Repetition (of sentences and phrases) | Reading / writing               | Grammar in language production | Word retrieval in spontaneous speech | Phonological structure in spontaneous speech | Object knowledge | Motor speech                                             |
|-------------|---------------------------|--------------------------------------------------|----------------------|---------------------------------------|---------------------------------|--------------------------------|--------------------------------------|----------------------------------------------|------------------|----------------------------------------------------------|
| nfvPPA      | (+)                       | (-)                                              | UNS                  | UNS                                   | UNS                             | - <sup>A</sup>                 | UNS                                  | UNS                                          | (+)              | -<br>(apraxia of speech) <sup>A</sup>                    |
| svPPA       | -                         | UNS                                              | -                    | (+)                                   | (-)<br>(surface dyslex./dysgr.) | (+) <sup>B</sup>               | UNS                                  | UNS                                          | (-)              | (+) <sup>B</sup><br>(no form of a motor speech disorder) |
| lvPPA       | (+) <sup>B</sup>          | UNS                                              | -                    | -                                     | UNS                             | (+)                            | -                                    | (-)                                          | (+) <sup>B</sup> | (+)<br>(no form of a motor speech disorder)              |

*Note.* + denotes intact performance, - denotes impaired performance; UNS = unspecified for respective subtype; parentheses indicate facultative (supporting) features; <sup>A</sup> either apraxia of speech or agrammatism are necessary for a subtype diagnosis of nfvPPA; <sup>B</sup> according to consensus criteria: features combine into one criterion in the respective subtype (therefore, the number of criteria in parentheses can differ from the number of “other features” in Gorno-Tempini et al., 2011).

## Reference

Gorno-Tempini, M. L., Hillis, A. E., Weintraub, S., Kertesz, A., Mendez, M., Cappa, S. F., Ogar, J. M., Rohrer, J. D., Black, S., Boeve, B. F., Manes, F., Dronkers, N. F., Vandenberghe, R., Rascovsky, K., Patterson, K., Miller, B. L., Knopman, D. S., Hodges, J. R., Mesulam, M. M., & Grossman, M. (2011). Classification of primary progressive aphasia and its variants. *Neurology*, 76(11), 1006–1014. <https://doi.org/10.1212/WNL.0b013e31821103e6>
