# Supplementary material
Source: publisher figshare collection journal article supplement (https://asha.figshare.com/articles/dataset/_/22555534)
Supplement: Supplementary file 2 [file 1]

**Supplemental Material S2.** Definition of auditory speech characteristics (features).

| Scale                     | Feature                                                                            | Feature description                                                                                                                                                                                                                                                                                |
|---------------------------|------------------------------------------------------------------------------------|----------------------------------------------------------------------------------------------------------------------------------------------------------------------------------------------------------------------------------------------------------------------------------------------------|
| Speech breathing (BREATH) | Shortened breath groups (within-word-pauses and inappropriate between-word pauses) | result from frequent inspiratory pauses; inspiratory pauses may violate linguistic and prosodic boundaries (e.g., inspiration may be noted within multisyllabic words or within phrase boundaries)                                                                                                 |
|                           | Speaking on residual air                                                           | parts of utterances are produced with residual air; typically characterized by a strained voice quality during speech production in conjunction with effortful inspiration; predominantly evident at the end of a phrase; in severe cases also during multisyllabic words                          |
|                           | Audible/strenuous inspiration                                                      | inspirations are characterized by frication noise and increased durations; may be associated with a clavicular breathing pattern and hyperextension of the neck and/or torso                                                                                                                       |
| Pitch and loudness (PL)   | Low pitch                                                                          | speaking fundamental frequency is perceived as too low or too high given the talker's gender and age                                                                                                                                                                                               |
|                           | High pitch                                                                         |                                                                                                                                                                                                                                                                                                    |
|                           | Low volume                                                                         | vocal loudness appears inappropriate given the speaking conditions (distance between patient and examiner, one-on-one setting); low volume may be particularly evident at the end of phrases; high volume typically occurs with the onset of phonation                                             |
|                           | High volume                                                                        |                                                                                                                                                                                                                                                                                                    |
| Vocal quality (VOQ)       | Breathy                                                                            | vocal quality is characterized by frication noise generated by air passing through the glottis as a result of incomplete or absent vocal fold adduction; voice is low in resonance and intensity; most severe form: aphonia (soft, voiceless phonation)                                            |
|                           | Strained-strangled                                                                 | voice sounds laborious; characterized by hard vocal attacks; pharyngealized vocal setting; most severe form: aphonia (strained voiceless whisper)                                                                                                                                                  |
|                           | Harsh                                                                              | voice quality is harsh, rough, or diplophonic                                                                                                                                                                                                                                                      |
| Vocal stability (VOS)     | Changes in voice quality                                                           | unpredictable, sudden changes in voice quality; may either fluctuate between normal and pathological voice (e.g., breathy) or between pathological patterns (e.g., fluctuating between breathy and strained-strangled); fluctuations may cause the impression of unstable, frail, or "whiny" voice |

|                       |                                        |                                                                                                                                                                                                                                                                                                                                                                                                                                                       |
|-----------------------|----------------------------------------|-------------------------------------------------------------------------------------------------------------------------------------------------------------------------------------------------------------------------------------------------------------------------------------------------------------------------------------------------------------------------------------------------------------------------------------------------------|
|                       | Pitch/loudness changes                 | unpredictable changes in pitch and loudness; may be perceived as overall unstable and poorly controlled phonation                                                                                                                                                                                                                                                                                                                                     |
|                       | Vocal tremor/vocal flutter             | regular (periodic) fluctuations in pitch or loudness                                                                                                                                                                                                                                                                                                                                                                                                  |
|                       | Devoicing, vocal decay, vocal stoppage | voiced segments or syllables are devoiced (devoicing) and/or vocal loudness decreases over time and becomes breathier and even aphonic (vocal decay) and/or phonation abruptly ceases (vocal stoppage); features may occur alone or in combination                                                                                                                                                                                                    |
|                       | Involuntary vocalizations              | sudden, involuntary vocalizations (e.g., groans, grunts, sighs); vocalizations are neither pragmatically nor affectively triggered/motivated                                                                                                                                                                                                                                                                                                          |
| Sound production (SP) | Sound errors – phonemic type           | inconsistently occurring sound errors perceived as proper sounds of the speaker’s native language (categorical sound error); includes phonemically perceived sound substitutions, additions, and omissions; if contextual origin is evident: anticipations, perseverations, or metatheses                                                                                                                                                             |
|                       | Sound errors – phonetic type           | inconsistently occurring sound errors perceived as articulatory distorted, “ill-formed” sounds of a respective language (gradual aberration from a target sound, e.g., overaspirated, denasalized, retracted, less rounded); need not be limited to individual sounds but may also affect transitions between sounds (coarticulatory errors); distinguished from <i>overall</i> reduced articulatory precision (as it may occur in dysarthric speech) |
|                       | Open articulation                      | flexible jaw support is lacking while the jaw is fixed in a largely open position; tongue movements may be visible.                                                                                                                                                                                                                                                                                                                                   |
|                       | Closed articulation                    | flexible jaw support is lacking while the jaw is fixed in a largely closed position; upper and lower teeth may be in contact during speech production                                                                                                                                                                                                                                                                                                 |
|                       | Overall reduced articulation           | phonetic contrasts are overall reduced; in extreme cases: phonetic features are only approximated or completely neutralized; distinguished from errors affecting single sound segments (errors of phonetic and phonemic type) or single sound transitions                                                                                                                                                                                             |
|                       | Fluctuating articulatory precision     | sudden, unpredictable changes in speech precision (from unimpaired to reduced, in extreme cases: from reduced to excessive speech precision);                                                                                                                                                                                                                                                                                                         |

|                          |                                                                   |                                                                                                                                                                                                                                                                                                                                                                                                        |
|--------------------------|-------------------------------------------------------------------|--------------------------------------------------------------------------------------------------------------------------------------------------------------------------------------------------------------------------------------------------------------------------------------------------------------------------------------------------------------------------------------------------------|
|                          |                                                                   | distinguished from inconsistently occurring sound errors of phonetic and/or phonemic type                                                                                                                                                                                                                                                                                                              |
| Nasal resonance (RES)    | Hypernasality                                                     | vowels and oral consonants are produced with excessive nasal resonance; nasal emissions; in severe cases: oral consonants are substituted by nasal consonants (e.g., /b/ → /m/)                                                                                                                                                                                                                        |
|                          | Mixed nasality                                                    | intermittent episodes of increased and decreased nasality; episodes of hyponasality are characterized by insufficient nasal resonance in nasal consonants; in severe cases: nasal consonants are released as plosives (e.g., /m/ → /b/)                                                                                                                                                                |
| Articulation rate (RATE) | Reduced overall articulation rate                                 | overall articulation rate appears abnormally slow due to prolonged durations of sounds, sound transitions (including intrusive schwa) and/or occlusion phases during plosive productions                                                                                                                                                                                                               |
|                          | Prolongations of single consonants, vowels, and sound transitions | single sounds and/or sound transitions (including intrusive schwa) are audibly prolonged beyond a speaker’s possible overall reduced articulation rate                                                                                                                                                                                                                                                 |
|                          | Increased articulation rate                                       | articulatory rate appears too fast or rushed                                                                                                                                                                                                                                                                                                                                                           |
| Speech fluency (FLU)     | Unfilled speech disruptions (pauses)                              | speech fluency is disrupted by pauses (within-word-pauses and/or inappropriate between-word pauses); pauses can be caused by frequent/inadequate inspirations or silent articulatory groping; distinguished from (inaudible) speech blocks and delayed speech onsets. The feature is not to be confounded with delays caused by cognitive or linguistic processing deficits (e.g., lexical retrieval). |
|                          | Filled speech disruptions                                         | speech fluency is disrupted by audible phenomena such as overt articulatory groping or phonemic conduite d’approche, including attempts to self-correct; distinguished from (audible) speech blocks                                                                                                                                                                                                    |
|                          | Sound-/syllable repetitions                                       | speech is disrupted by stuttering-like repetitions of sound or syllables; repetitions are iterative/oscillatory in nature (e.g., /tə tə tə tə to'ma:tə/; engl. tomato); distinguished from overt articulatory groping or phonemic conduite d’approche                                                                                                                                                  |
|                          | Speech blocks                                                     | involuntary cessations of sounds and airflow during speech; may occur in audible form (e.g., a sound is “stuck”) or in inaudible form (complete vocal tract closure, no sound or escaping air is audible).                                                                                                                                                                                             |

|                         |                                          |                                                                                                                                                                                                                                                                                                                                                                                                                                           |
|-------------------------|------------------------------------------|-------------------------------------------------------------------------------------------------------------------------------------------------------------------------------------------------------------------------------------------------------------------------------------------------------------------------------------------------------------------------------------------------------------------------------------------|
|                         | Reduced initiation/maintenance of speech | may be manifested by increased latencies in the initiation of speech (delayed speech onsets) or in fading of articulatory activity within utterances without or with delayed re-initiation. The feature is not to be confounded with delays caused by linguistic processing deficits (e.g., lexical retrieval) or articulatory groping. The feature is typically less pronounced when speech is preceded by prompts (e.g., in repetition) |
| Modulation (MOD)        | Reduced pitch and loudness modulation    | perceptual impression of flat intonation; reduced pitch / loudness modulation may not be sufficient to appropriately mark lexical-/sentence stress and adequately index the sentence type (e.g., interrogative)                                                                                                                                                                                                                           |
|                         | Syllabic (scanning) speech               | syllable boundaries are clearly marked by pauses (syllable segregation) and/or prosodic modulation is characterized by equal stress across syllables (syllable isochrony)                                                                                                                                                                                                                                                                 |
|                         | Blurring of syllable boundaries          | the rhythmical pattern of utterances is diminished or even completely unrecognizable; syllable boundaries may no longer be discernible                                                                                                                                                                                                                                                                                                    |
| Speech behavior (BEHAV) | Articulatory groping                     | difficulty in targeting the required articulation configuration; may manifest audibly (e.g. /pə...m::...p <sup>h</sup> ..pə..po..tə.. to'ma:tə) or silently (visible groping); is of apparent motor origin and may also include whole-word “trial-and-error” attempts (e.g., /ə::o'ma:tə..to'ma:tə)                                                                                                                                       |
|                         | High articulatory effort                 | audible and/or visible effort in the production of speech movements expressed by exaggeratedly large speech movements and/or excessive orofacial constrictive forces; articulatory effort may also involve the respiratory and/or phonatory musculature                                                                                                                                                                                   |
